# Supplementary material
Source: publisher figshare collection journal article supplement (https://sage.figshare.com/ndownloader/files/20098487)
Supplement: Supplementary file 1 [file 20098487]

# Veterinary Pathology: Supplemental Materials.

Pagano et al. Muscular sarcocystosis in sheep associated with lymphoplasmacytic myositis and expression of major histocompatibility complex class I and II.

**Supplemental Table S2:** The row data are reported in the table. **Cyst number** (cysts/cm<sup>2</sup>). indicate the number of cysts per cm<sup>2</sup>. **Atrophy score.** The fiber atrophy was scored based on assessment of 100 fibers at 200X magnification: mild (score 1), <10% atrophic fibers; moderate (score 2), 10% to 50% atrophic fibers; and severe (score 3), >50% of atrophic fibers. **Lymphoplasmacytic inflammation score.** The number of lymphocytes and plasma cells were scored based on light microscopy: no infiltration (score 0); mild infiltration (score 1), 5 to 25 lymphocytes/plasma cells per high-power field (HPF) (400X); moderate infiltration (score 2), 26 to 50 lymphocytes/plasma cells per HPF; and severe infiltration (score 3), more than 50 lymphocytes/plasma cells per HPF. **MHC I immunopositivity score and MHC II immunopositivity score.** The percentage of muscle fibers with sarcolemmal positivity to major histocompatibility complex I and II (MHC I and II) were scored as follows: absent/none (score 0), 0%; mild (score 1), 1% to 25%; moderate (score 2), 26% to 50%; and severe (score 3), more than 50%. **MHC I positive Cysts** (cysts/cm<sup>2</sup>). Indicate the number of MHC I positive cysts per cm<sup>2</sup>. **DYS 1 positive cysts** (cysts/cm<sup>2</sup>). Indicate the number of DYS 1 positive cysts per cm<sup>2</sup>. **Inflammation score.** Is the sum of Lymphoplasmacytic inflammation score, MHC I immunopositivity score and MHC II immunopositivity score.

| Case number | Cyst number (cysts/cm <sup>2</sup> ) | Atrophy score | Lymphoplasmacytic inflammation score | MHC I immunopositivity score | MHC II immunopositivity score | MHC I positive Cysts (cysts/cm <sup>2</sup> ) | Dys 1 positive cysts (cysts/cm <sup>2</sup> ) | Inflammation score |
|-------------|--------------------------------------|---------------|--------------------------------------|------------------------------|-------------------------------|-----------------------------------------------|-----------------------------------------------|--------------------|
| 1           | 9                                    | 1             | 0                                    | 2                            | 2                             | 0                                             | 0                                             | 4                  |
| 2           | 7                                    | 2             | 0                                    | 1                            | 1                             | 0                                             | 0                                             | 2                  |
| 3           | 3                                    | 1             | 0                                    | 0                            | 0                             | 0                                             | 0                                             | 0                  |
| 4           | 11                                   | 0             | 0                                    | 2                            | 1                             | 0                                             | 0                                             | 3                  |
| 5           | 15                                   | 1             | 0                                    | 2                            | 2                             | 5                                             | 0                                             | 4                  |
| 6           | 9                                    | 0             | 0                                    | 1                            | 1                             | 0                                             | 0                                             | 2                  |
| 7           | 10                                   | 1             | 0                                    | 1                            | 1                             | 4                                             | 0                                             | 2                  |
| 8           | 1                                    | 1             | 0                                    | 2                            | 2                             | 0                                             | 0                                             | 4                  |
| 9           | 13                                   | 1             | 0                                    | 3                            | 2                             | 0                                             | 0                                             | 5                  |
| 10          | 0                                    | 1             | 0                                    | 0                            | 0                             | 0                                             | 0                                             | 0                  |
| 11          | 4                                    | 0             | 0                                    | 1                            | 1                             | 0                                             | 0                                             | 2                  |
| 12          | 10                                   | 1             | 0                                    | 1                            | 1                             | 5                                             | 0                                             | 2                  |
| 13          | 7                                    | 1             | 0                                    | 1                            | 1                             | 0                                             | 0                                             | 2                  |
| 14          | 60                                   | 2             | 0                                    | 2                            | 1                             | 1                                             | 1                                             | 3                  |
| 15          | 17                                   | 0             | 0                                    | 2                            | 2                             | 2                                             | 2                                             | 4                  |
| 16          | 2                                    | 2             | 0                                    | 1                            | 1                             | 0                                             | 0                                             | 2                  |
| 17          | 8                                    | 0             | 0                                    | 1                            | 1                             | 3                                             | 0                                             | 2                  |
| 18          | 3                                    | 0             | 0                                    | 1                            | 1                             | 1                                             | 0                                             | 2                  |
| 19          | 5                                    | 1             | 0                                    | 2                            | 2                             | 2                                             | 0                                             | 4                  |
| 20          | 32                                   | 2             | 0                                    | 2                            | 2                             | 12                                            | 1                                             | 4                  |
| 21          | 3                                    | 1             | 0                                    | 1                            | 1                             | 2                                             | 0                                             | 2                  |
| 22          | 8                                    | 2             | 0                                    | 1                            | 1                             | 3                                             | 0                                             | 2                  |
| 23          | 6                                    | 0             | 0                                    | 1                            | 1                             | 3                                             | 0                                             | 2                  |
| 24          | 20                                   | 1             | 1                                    | 3                            | 1                             | 13                                            | 2                                             | 5                  |
| 25          | 23                                   | 1             | 1                                    | 2                            | 3                             | 10                                            | 2                                             | 6                  |
| 26          | 4                                    | 2             | 1                                    | 2                            | 2                             | 0                                             | 0                                             | 5                  |
| 27          | 16                                   | 1             | 1                                    | 2                            | 1                             | 5                                             | 0                                             | 4                  |
| 28          | 9                                    | 1             | 1                                    | 2                            | 1                             | 5                                             | 0                                             | 4                  |
| 29          | 4                                    | 1             | 1                                    | 1                            | 1                             | 2                                             | 0                                             | 3                  |
| 30          | 10                                   | 1             | 1                                    | 3                            | 3                             | 4                                             | 0                                             | 7                  |
| 31          | 18                                   | 2             | 1                                    | 3                            | 3                             | 12                                            | 3                                             | 7                  |
| 32          | 8                                    | 1             | 1                                    | 2                            | 2                             | 3                                             | 0                                             | 5                  |
| 33          | 10                                   | 1             | 1                                    | 2                            | 2                             | 4                                             | 0                                             | 5                  |
| 34          | 13                                   | 1             | 1                                    | 2                            | 2                             | 4                                             | 0                                             | 5                  |
| 35          | 7                                    | 1             | 1                                    | 2                            | 2                             | 4                                             | 0                                             | 5                  |
| 36          | 8                                    | 0             | 1                                    | 2                            | 2                             | 5                                             | 0                                             | 5                  |
| 37          | 26                                   | 1             | 1                                    | 2                            | 3                             | 11                                            | 0                                             | 6                  |
| 38          | 23                                   | 2             | 1                                    | 1                            | 1                             | 14                                            | 0                                             | 3                  |
| 39          | 2                                    | 1             | 1                                    | 1                            | 1                             | 0                                             | 0                                             | 3                  |
| 40          | 19                                   | 2             | 1                                    | 2                            | 2                             | 15                                            | 2                                             | 5                  |
| 41          | 26                                   | 2             | 1                                    | 1                            | 0                             | 2                                             | 0                                             | 2                  |
| 42          | 4                                    | 2             | 1                                    | 1                            | 1                             | 1                                             | 0                                             | 3                  |
| 43          | 8                                    | 2             | 1                                    | 1                            | 1                             | 12                                            | 0                                             | 3                  |
| 44          | 28                                   | 2             | 1                                    | 3                            | 3                             | 15                                            | 0                                             | 7                  |
| 45          | 4                                    | 2             | 1                                    | 2                            | 2                             | 0                                             | 0                                             | 5                  |
| 46          | 15                                   | 2             | 1                                    | 2                            | 2                             | 4                                             | 0                                             | 5                  |
| 47          | 21                                   | 2             | 1                                    | 1                            | 1                             | 10                                            | 0                                             | 3                  |
| 48          | 2                                    | 1             | 1                                    | 2                            | 2                             | 0                                             | 0                                             | 5                  |
| 49          | 2                                    | 0             | 1                                    | 1                            | 1                             | 0                                             | 0                                             | 3                  |
| 50          | 7                                    | 1             | 1                                    | 1                            | 1                             | 0                                             | 0                                             | 3                  |
| 51          | 1                                    | 1             | 1                                    | 2                            | 3                             | 0                                             | 0                                             | 6                  |
| 52          | 4                                    | 1             | 1                                    | 2                            | 2                             | 0                                             | 0                                             | 5                  |
| 53          | 17                                   | 1             | 1                                    | 3                            | 3                             | 10                                            | 4                                             | 7                  |
| 54          | 10                                   | 1             | 1                                    | 3                            | 2                             | 4                                             | 0                                             | 6                  |
| 55          | 2                                    | 2             | 1                                    | 2                            | 1                             | 0                                             | 0                                             | 4                  |
| 56          | 10                                   | 1             | 2                                    | 3                            | 2                             | 3                                             | 0                                             | 7                  |
| 57          | 0                                    | 0             | 2                                    | 1                            | 1                             | 0                                             | 0                                             | 4                  |
| 58          | 4                                    | 2             | 2                                    | 1                            | 1                             | 0                                             | 1                                             | 4                  |
| 59          | 1                                    | 1             | 2                                    | 3                            | 3                             | 0                                             | 0                                             | 8                  |
| 60          | 22                                   | 1             | 2                                    | 3                            | 2                             | 9                                             | 3                                             | 7                  |
| 61          | 20                                   | 1             | 2                                    | 1                            | 1                             | 8                                             | 3                                             | 4                  |
| 62          | 9                                    | 1             | 2                                    | 2                            | 1                             | 8                                             | 0                                             | 5                  |
| 63          | 35                                   | 1             | 2                                    | 1                            | 2                             | 13                                            | 3                                             | 5                  |
| 64          | 22                                   | 0             | 2                                    | 1                            | 1                             | 15                                            | 2                                             | 4                  |
| 65          | 2                                    | 2             | 2                                    | 2                            | 1                             | 2                                             | 0                                             | 5                  |
| 66          | 7                                    | 2             | 2                                    | 2                            | 1                             | 2                                             | 0                                             | 5                  |
| 67          | 70                                   | 1             | 2                                    | 3                            | 2                             | 30                                            | 10                                            | 7                  |
| 68          | 6                                    | 3             | 2                                    | 3                            | 2                             | 3                                             | 0                                             | 7                  |
| 69          | 25                                   | 3             | 2                                    | 3                            | 2                             | 12                                            | 0                                             | 7                  |
| 70          | 11                                   | 0             | 2                                    | 2                            | 2                             | 4                                             | 0                                             | 6                  |
| 71          | 9                                    | 2             | 2                                    | 2                            | 1                             | 7                                             | 4                                             | 5                  |
| 72          | 30                                   | 1             | 2                                    | 2                            | 1                             | 13                                            | 4                                             | 5                  |
| 73          | 8                                    | 1             | 2                                    | 3                            | 3                             | 7                                             | 0                                             | 8                  |
| 74          | 15                                   | 1             | 2                                    | 3                            | 1                             | 10                                            | 0                                             | 6                  |
| 75          | 9                                    | 2             | 2                                    | 1                            | 1                             | 6                                             | 0                                             | 4                  |
| 76          | 18                                   | 2             | 3                                    | 3                            | 3                             | 17                                            | 1                                             | 9                  |
| 77          | 58                                   | 1             | 3                                    | 3                            | 3                             | 32                                            | 11                                            | 9                  |
| 78          | 6                                    | 1             | 3                                    | 2                            | 1                             | 6                                             | 0                                             | 6                  |

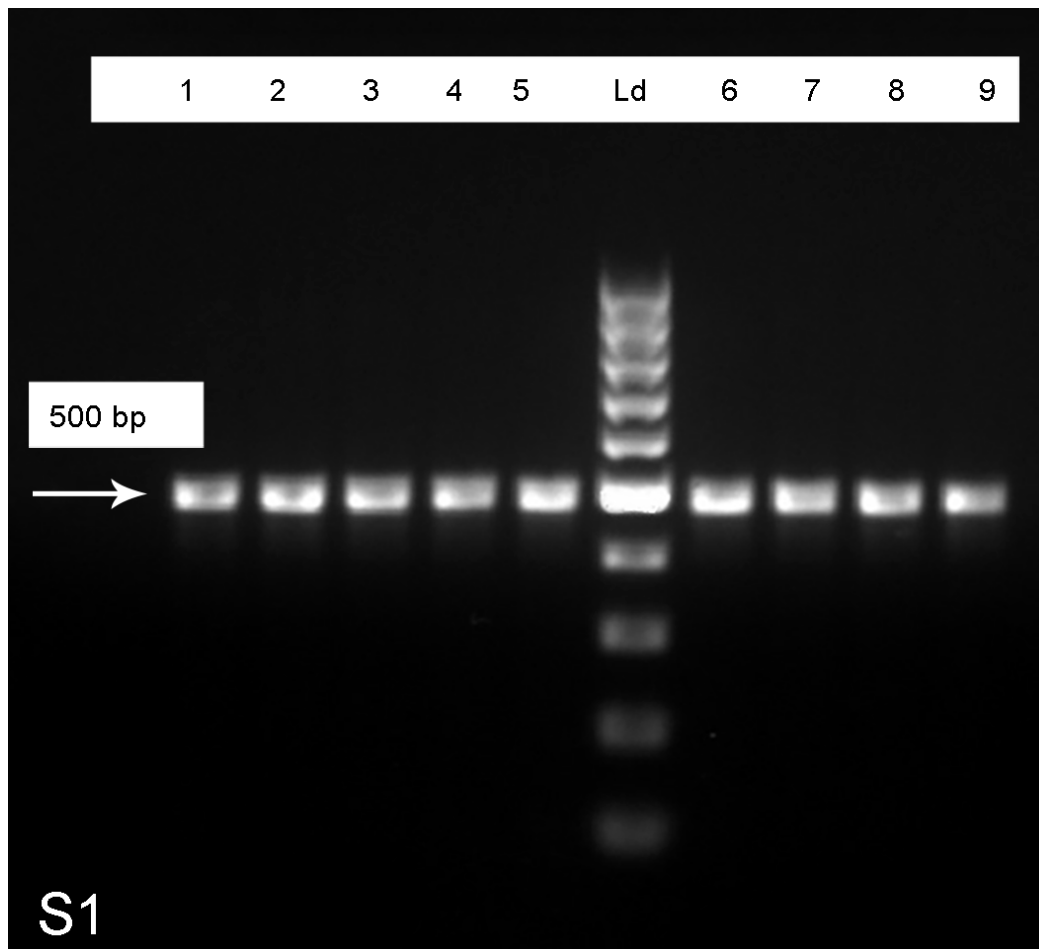

**Supplemental Figure S1:** Cases 1-9. Electrophoresis of PCR for *Sarcocystis* 18S rRNA gene. A band of 500 bp (arrow) was obtained for all the samples analyzed.
